# Supplementary material
Source: PubMed Central journal article supplement (PMC7210703)
Supplement: mmc1.pdf [file mmc1.pdf]

**Supplemental Information**

**Oncolytic Adenovirus Armed with BiTE, Cytokine,  
and Checkpoint Inhibitor Enables CAR T Cells  
to Control the Growth of Heterogeneous Tumors**

**Caroline E. Porter, Amanda Rosewell Shaw, Youngrock Jung, Tiffany Yip, Patricia D. Castro, Vlad C. Sandulache, Andrew Sikora, Stephen Gottschalk, Michael M. Ittman, Malcolm K. Brenner, and Masataka Suzuki**

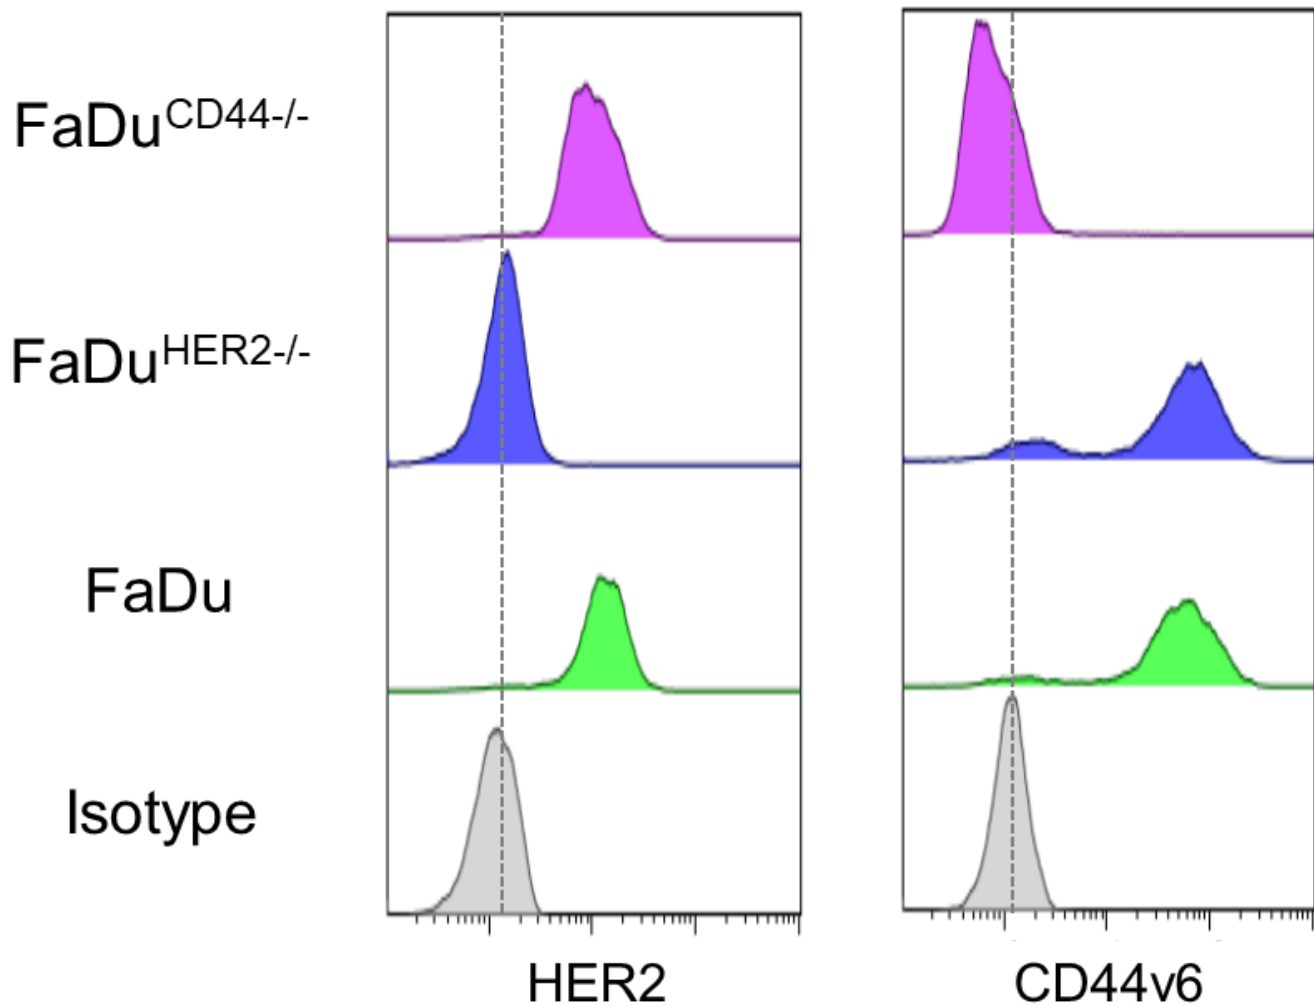

**Supplemental Fig. 1.** *CRISPR/Cas9* system effectively knocks out target genes in *FaDu* cells. We used the *CRISPR/Cas9* system to knock either CD44 or HER2 out of *FaDu* cells. After sorting knockout lines, we confirmed CD44 or HER2 receptor expression on these cells.

**A**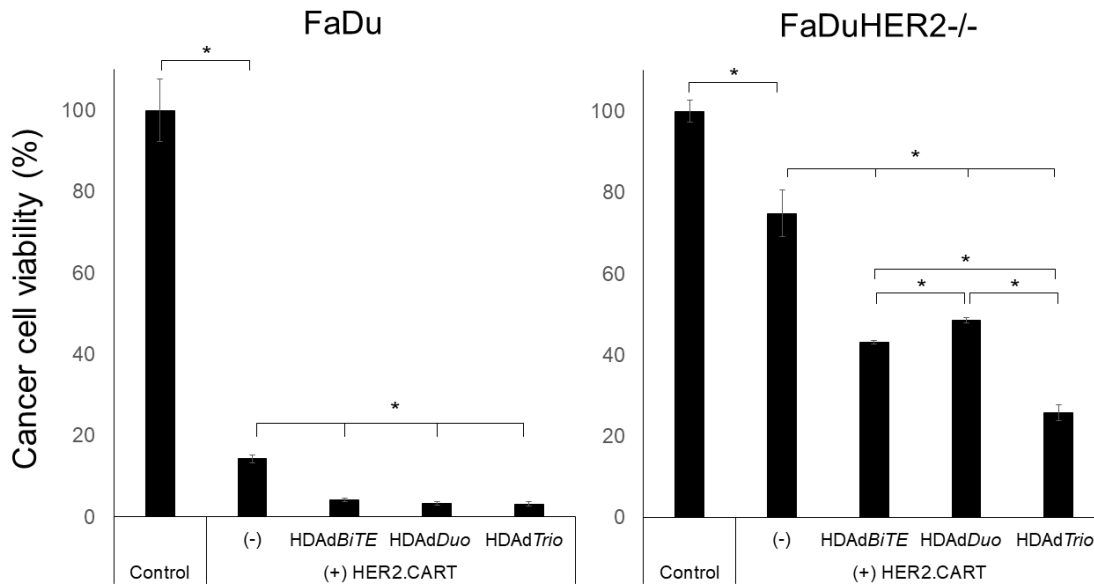**B**

❖CD8

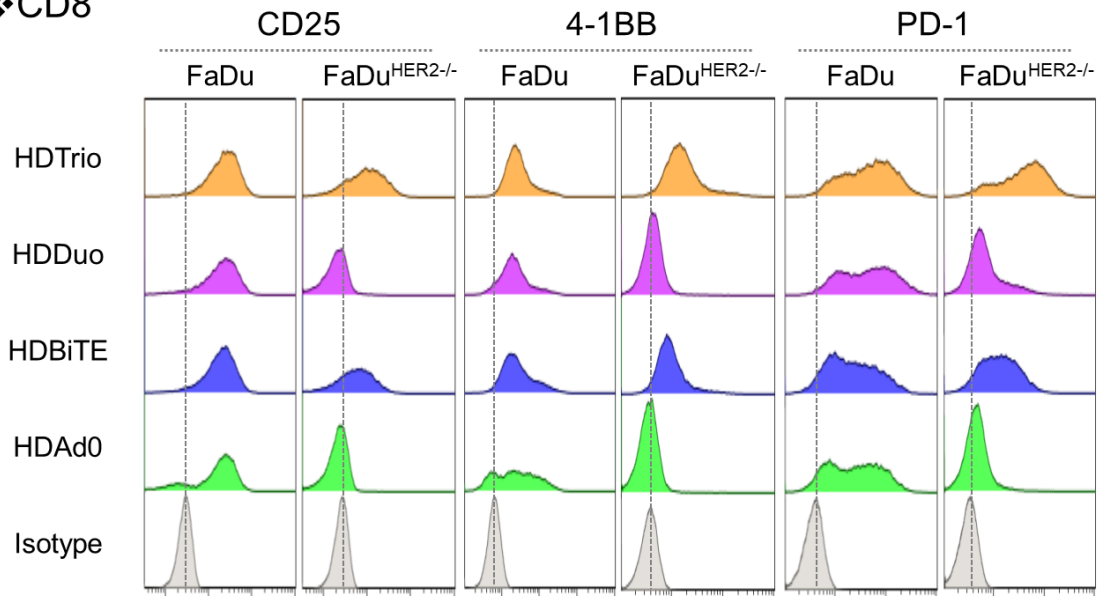

❖CD4

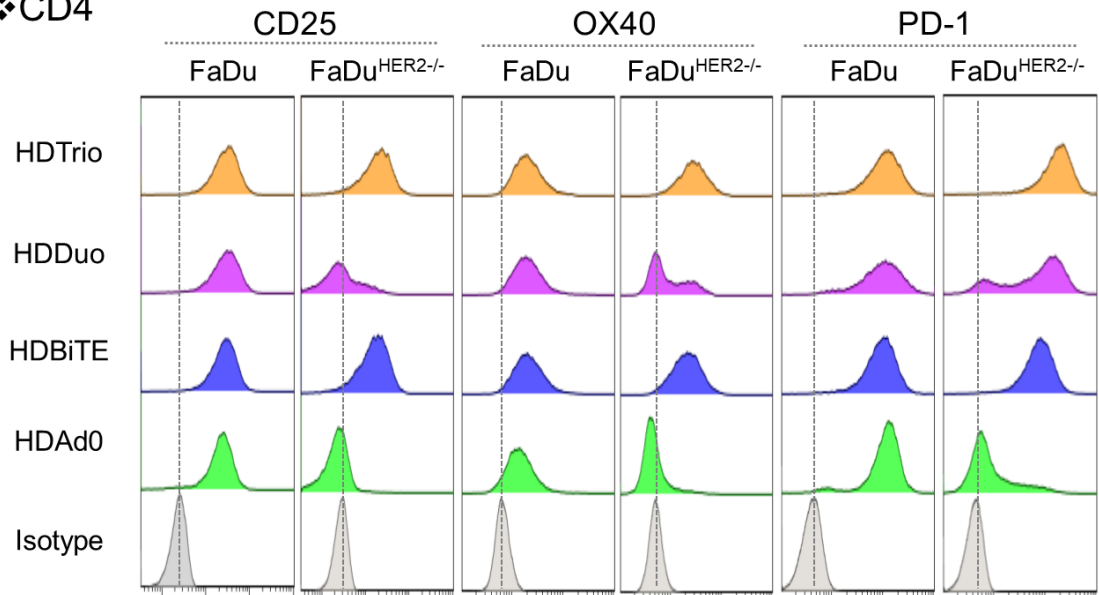

**Supplemental Fig. 2.** *HAd-derived CD44v6.BiTE, IL-12p70 and PD-L1 blocking antibody increase the anti-tumor efficacy of HER2.CAR T-cells in vitro.* **(A)** FaDu and FaDuHER2<sup>-/-</sup> expressing *ffLuc* cells were infected with 100 vp/cell of HAd0 (no transgene), HAdCD44v6.BiTE, HAdDuo or HAdTrio (n=5 per group). HER2.CARTs were added at 24 hr post-infection (E:T=1:20). Cells were harvested 72 hours post-coculture, and viable cancer cells were analyzed by luciferase assay. Data are presented as means  $\pm$  SD. \**P* < 0.001. **(B)** HER2.CARTs were harvested 72 hours post-coculture, and CD25, PD-1, 4-1BB and OX40 expression were analyzed by flow cytometry.

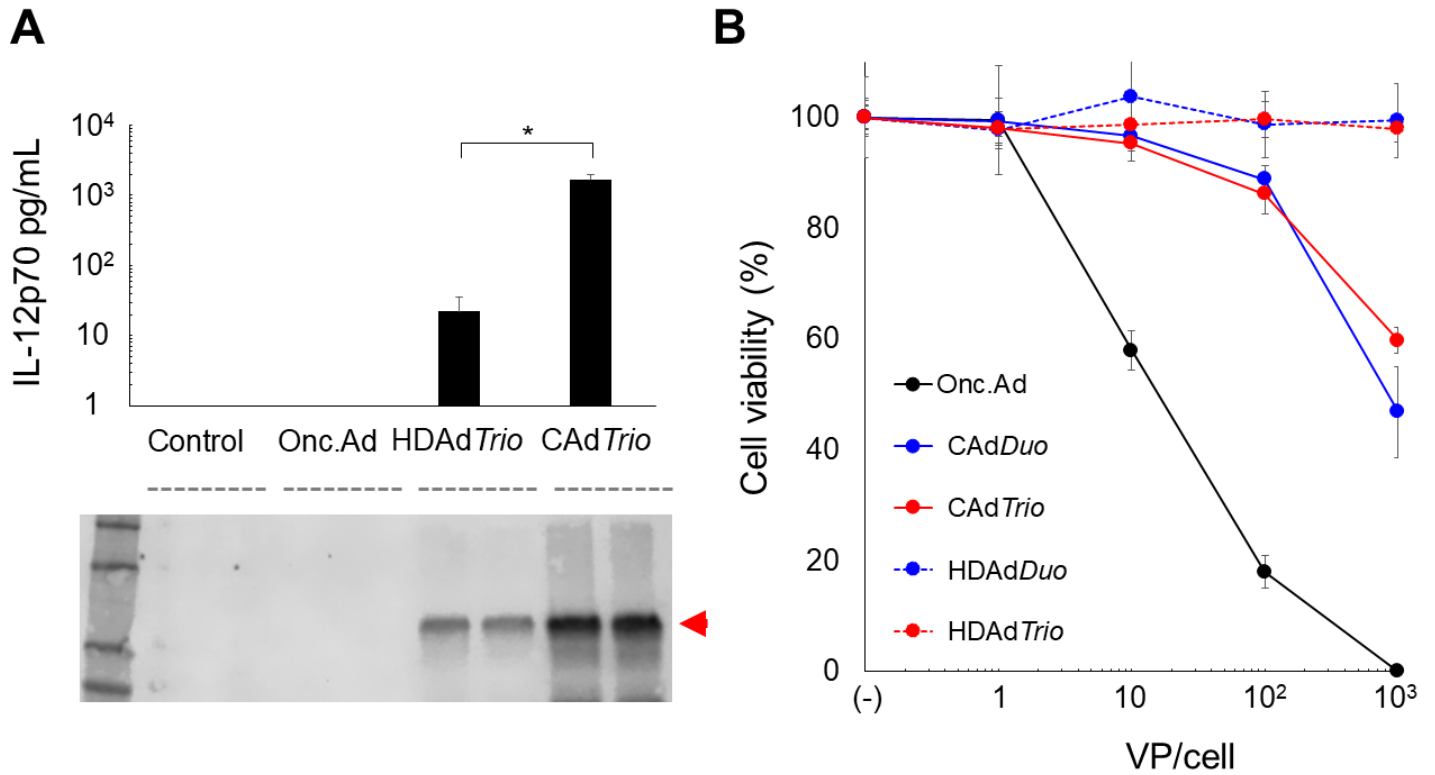

**Supplemental Fig. 3.** Co-infection of *Onc.Ad* with *HDA* expressing *BiTE*, *IL-12p70* and *PD-L1* mini-antibody amplifies *IL-12p70* and *PD-L1* blocking antibody expression with oncolysis *in vitro*. **(A)** FaDu was infected with a total 20 Vp/cell of *HDA**Trio*, *Onc.Ad* or with an *CAdTrio* (*Onc.Ad*:*HDA*=1:10) (n=4 per group). Medium samples were collected 48 hours post-infection. Levels of *IL-12p70* and *PD-L1* mini-antibody in media samples were quantified by *IL-12p70* ELISA assay and western blotting for *PD-L1* mini-antibody, respectively. Data are presented as means  $\pm$  SD. \**P* < 0.001. **(B)** FaDu was infected with increasing doses of *HDA*s, *Onc.Ad* or with *CAd*s (*Onc.Ad*: *HDA*=1:10) (n=6 per group). Viable cells were analyzed at 96 hours by MTS assay. Data are presented as means  $\pm$  SD.

**A**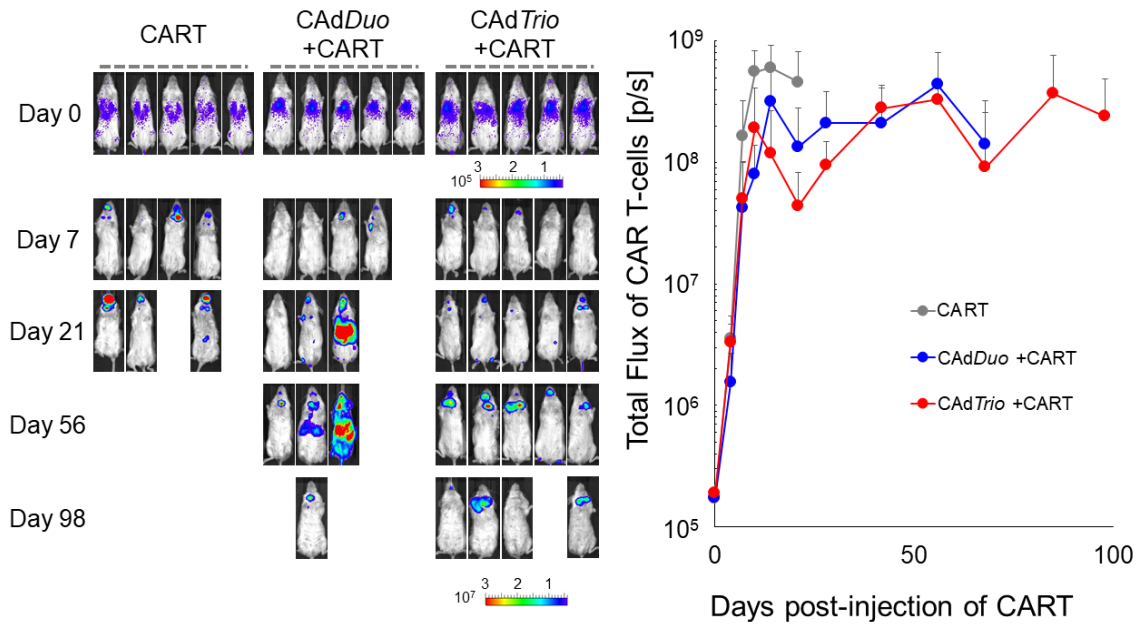**B**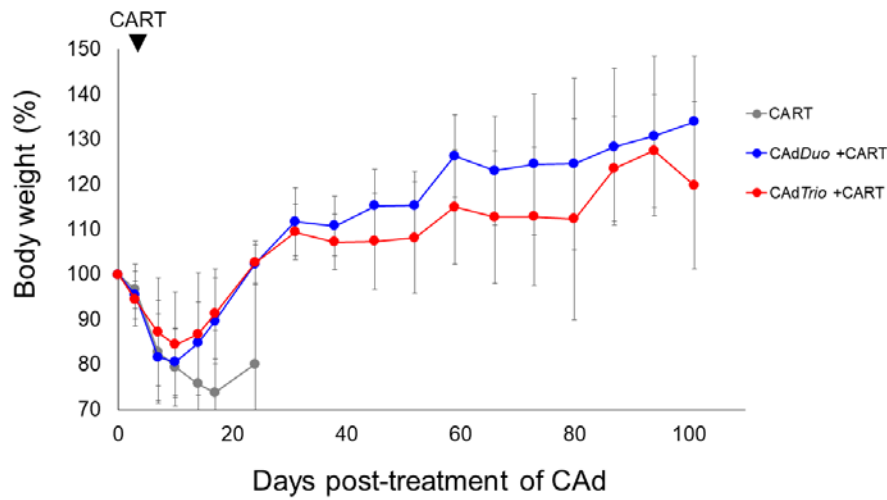**C**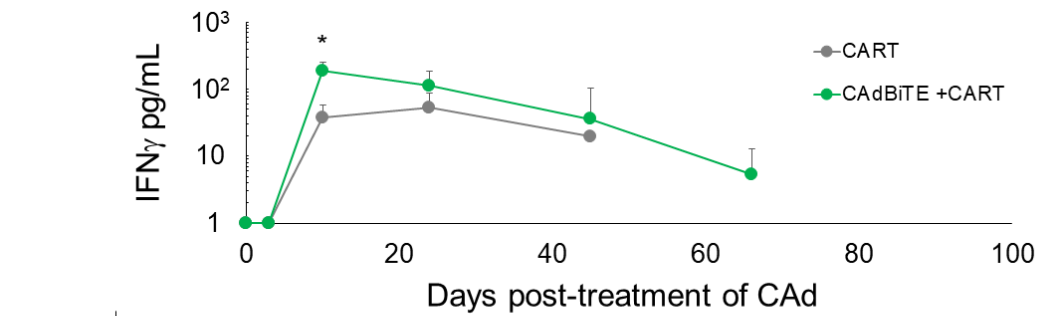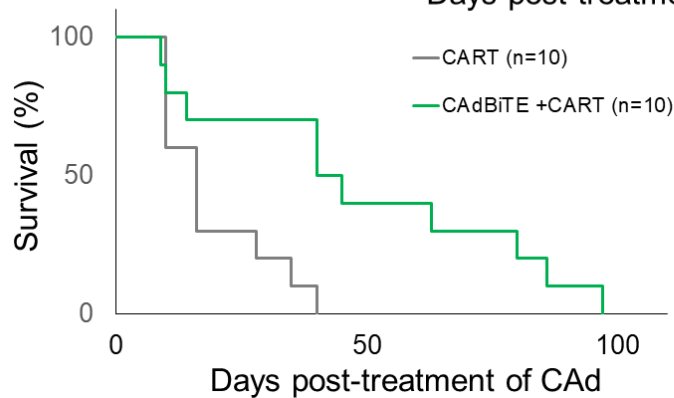

|                         | Control | CART   | CAdBiTE +CART |
|-------------------------|---------|--------|---------------|
| FaDu                    | 14 day  | 18 day | 45 day        |
| FaDu <sup>HER2-/-</sup> | 16 day  | 18 day | 63 day        |

**Supplemental Fig. 4.** *Combinatorial treatment can control both primary and metastasized tumors in an orthotopic HNSCC model.* **(A)** FaDu cells were transplanted into the tongues of NSG mice (n=5 per group). A total of  $1 \times 10^8$  vp of CAd<sub>s</sub> (Onc:HD=1:20) were injected into the tongue. A total of  $0.2 \times 10^6$  HER2.CARTs expressing *ffLuc* were systemically administered 3 days post-injection of CAd. Bioluminescence of HER2.CARTs at the tumor area was monitored at different time points. Data are presented as means  $\pm$  SD. **(B)** Body weight was measured at different time points. Data are presented as means  $\pm$  SD. **(C)** FaDu cells expressing *ffLuc* were transplanted into the tongues of NSG mice.  $1 \times 10^8$  vp of CAd<sub>BiTE</sub> (Onc:HD=1:20) were injected into the tongue.  $0.2 \times 10^6$  HER2.CARTs were systemically administered 3 days post-injection of CAd<sub>s</sub>. IFN $\gamma$  levels in were measured by ELISA from serum samples collected at 0, 3, 10, 24, 45, and 66 days post-injection of CAd<sub>s</sub> (n=10). Data are presented as means  $\pm$  SD. \**P* < 0.001. Kaplan-Meier survival curve after CAd<sub>BiTE</sub> administration in mice (n=10). Data are presented as means  $\pm$  SD. **Table** shows median survival of animals treated with CART alone or CAd<sub>BiTE</sub> plus CART.

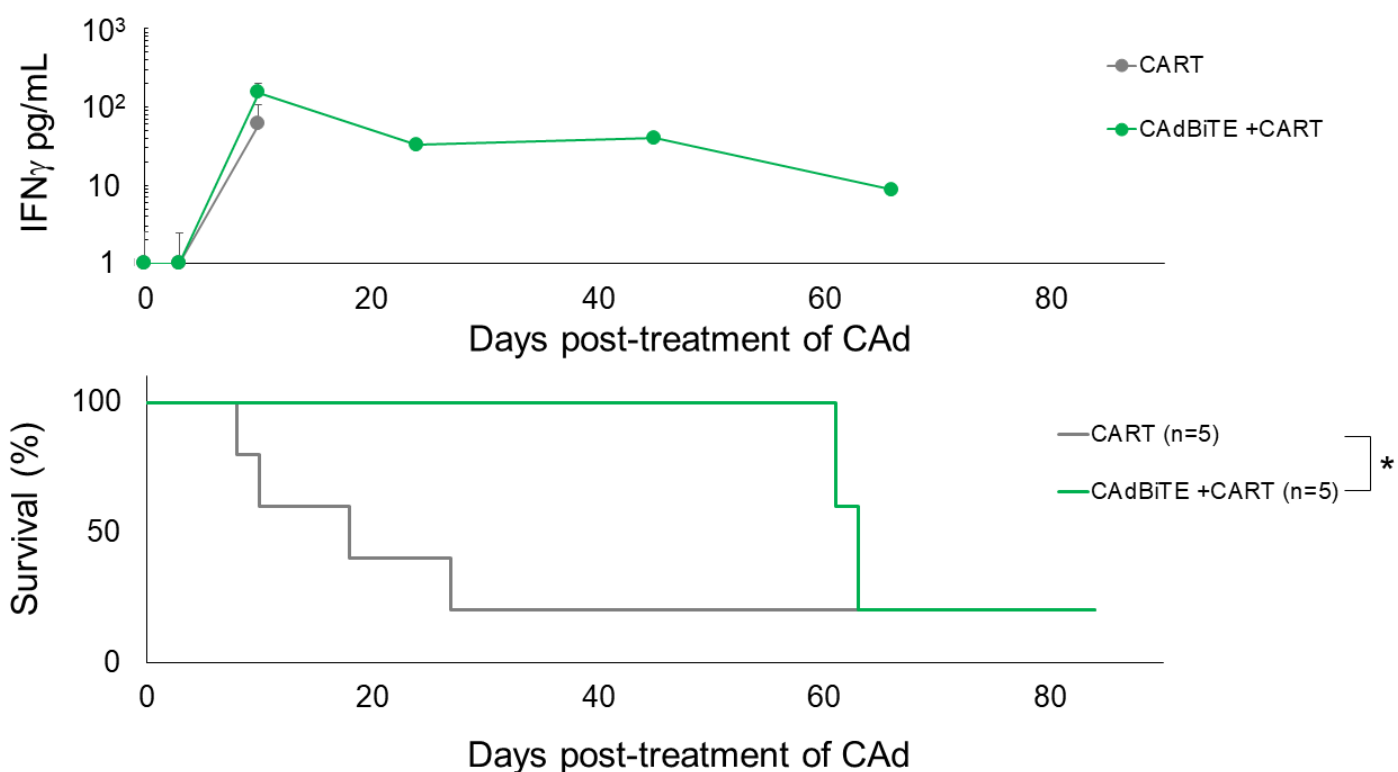

**Supplemental Fig. 5.** *CAd*-derived CD44v6.BiTE improves HER2.CAR T-cell anti-tumor effects in an orthotopic HER2<sup>-/-</sup> HNSCC model. FaDuHER2<sup>-/-</sup> cells expressing *ffLuc* were transplanted into the tongues of NSG mice. A total of  $1 \times 10^8$  vp of CAdbiTE (Onc:HD=1:20) were injected into the tongue. A total of  $1 \times 10^6$  HER2.CARTs were systemically administered 3 days post-injection of CAdbiTE. Bioluminescence of FaDuHER2<sup>-/-</sup> cells was monitored at different time points. Serum samples were collected at 0, 3, 10, 24, 45, 66 days post-injection of CAdbiTE (n=5), and IFN $\gamma$  levels in serum were measured by ELISA. Data are presented as means  $\pm$  SD. Kaplan-Meier survival curve after CAdbiTE administration (n=5). Data are presented as means  $\pm$  SD. \* $P < 0.02$ .
